# Supplementary material for: A qualitative study of the barriers to utilizing healthcare services among the tribal population in Assam
Source: PubMed Central journal article supplement (PMC7544062; doi:10.1371/journal.pone.0240096), 2020-10-08
Supplement: pone.0240096.s003.pdf [file pone.0240096.s003.pdf]

**JAWAHARLAL NEHRU UNIVERSITY**  
**SCHOOL OF SOCIAL SCIENCES**

01-03-2018

No. SSS/2018

Office Order No 120/18

Approval of the Dean is hereby conveyed for field work to the following M.Phil./Ph.d student(s) without any financial liability on the part of school for the said purpose, as per University rules, and as detailed below:

| S.No. | Name of the student/Deptt.         | Period of field work | Place of visit on field trip                        | Remarks, if any |
|-------|------------------------------------|----------------------|-----------------------------------------------------|-----------------|
| 01    | Supriya Singh<br>CSMCH/SSS         | 01-03-18 to 29-04-18 | Adarsh Nagar, Delhi                                 |                 |
| 02    | Shalini Punjabi<br>ZHCES/SSS       | 11-01-18 to 31-05-18 | Delhi                                               |                 |
| 03    | Srishti Chauhan<br>ZHCES/SSS       | 01-03-18 to 01-05-18 | Ambala, Haryana                                     |                 |
| 04    | Bianca Daw<br>ZHCES/SSS            | 26-02-18 to 30-04-18 | New Delhi                                           |                 |
| 05    | Chetana Naskar<br>CSR/D/SSS        | 24-02-18 to 30-05-18 | Kolkata, West Bengal                                |                 |
| 06    | Sanchari Mukhopadhyay<br>CSR/D/SSS | 23-02-18 to 20-05-18 | New Delhi, Haryana,<br>U P & NCR Region             |                 |
| 07    | Bandita Boro<br>CSR/D/SSS          | 05-03-18 to 05-04-18 | Assam                                               |                 |
| 08    | Aarti Mangal<br>ZHCES/SSS          | 26-02-18 to 30-04-18 | Delhi (Colleges, Central<br>Institute of Education) |                 |
| 09    | Roma Ranu Dash<br>ZHCES/SSS        | 26-02-18 to 26-04-18 | New Delhi                                           |                 |
| 10    | Sreya Sen<br>CSSS/SSS              | 01-03-18 to 16-03-18 | Kolkata                                             |                 |
| 11    | Aadil Farooq<br>CSMCH/SSS          | 05-03-18 to 21-07-18 | Jammu and Kashmir<br>(2 Districts)                  |                 |

This issues with the approval of the competent authority.

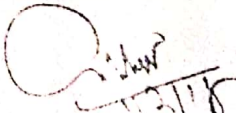  
(Ashok Kumar)  
Assistant Registrar

Students concerned.

Copy to:

1. Chairperson CSMCH, ZHCES, CSR/D, CSSS
2. Office order file
3. Budget file
4. A.F.O. Bills/S&P

1139/SSS  
12-3-2018
